# Supplementary material
Source: publisher site journal article supplement (https://www.spandidos-publications.com/2149/downloadSupplementary)

Figure S1. RNA-seq results of U2OS-xenograft zebrafish treated with TB. TB, theabrownin.

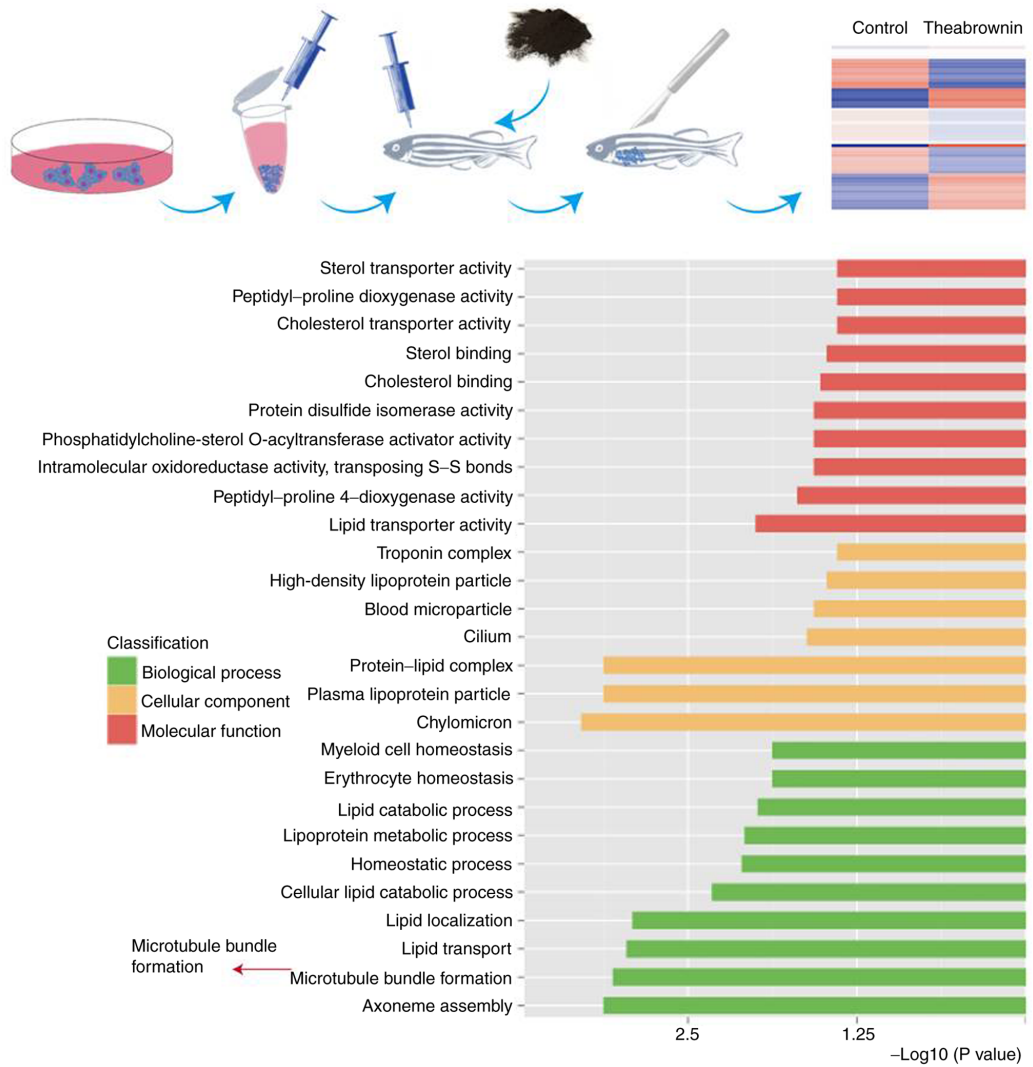

Figure S2. DAPI staining and immunofluorescent expression of NF- $\kappa$ B in U2OS cells treated with TB. TB, theabrownin.

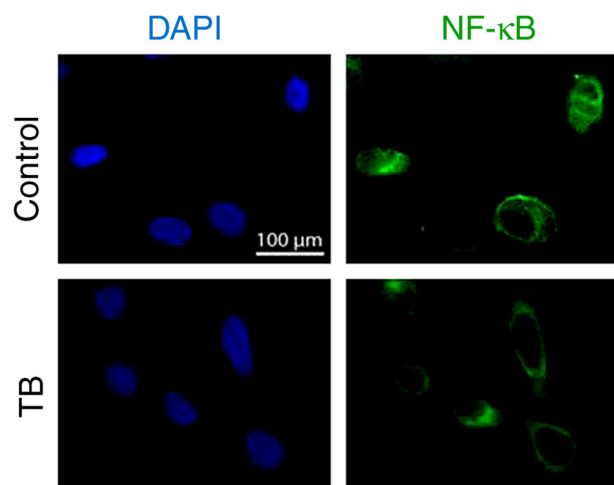

Supplement: Supplementary file 1 [file downloadSupplementary]
